# Supplementary material for: Comparison of online marketing techniques on food and beverage companies’ websites in six countries
Source: PubMed Central journal article supplement (PMC5658924; doi:10.1186/s12992-017-0303-z), 2017-10-26

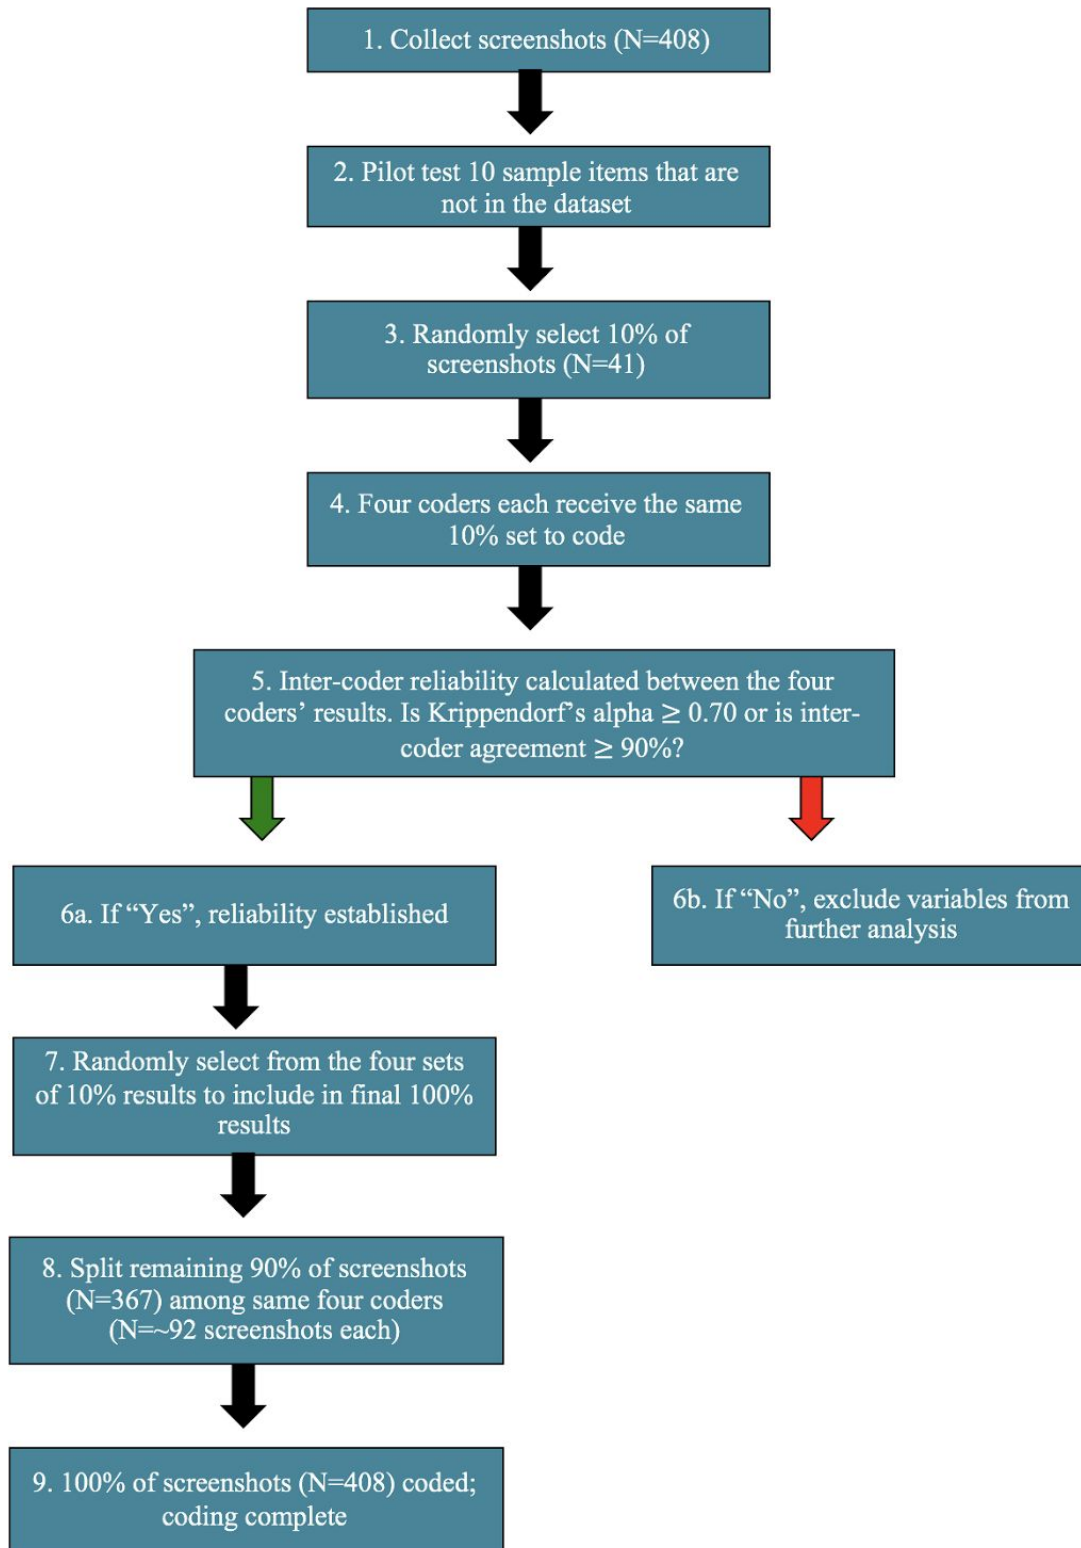

Supplement: 12992_2017_303_MOESM1_ESM.pdf [file 12992_2017_303_MOESM1_ESM.pdf]
